# Supplementary material
Source: ML conference proceedings conference paper supplement (https://openreview.net/forum?id=uvq4Nh8eZB)
Supplement: supplementary_material [file attachment]

## A PROOF OF PROPOSITION 1

For convenience, we restate the proposition.

**Proposition 1.** *For  $m \geq 3$  clients with local datasets  $D^1, \dots, D^m$  and unlabeled dataset  $U$  drawn iid from  $\mathcal{D}$ , let  $\mathcal{A}^i$  for  $i \in [m]$  be a set of learning algorithms that all achieve a linearly increasing training accuracy  $a_t$  for all labelings of  $U$ , i.e., there exists  $c \in \mathbb{R}_+$  such that  $a_t \geq 1 - c/t$ , then there exists  $t_0 \in \mathbb{N}$  such that  $a_t \geq 1/2$  and FEDCT with majority vote converges with probability  $1 - \delta$ , where*

$$\delta \leq |U|(4c)^{\frac{m}{2}} \zeta\left(\frac{m}{2}, t_0 + 1\right)$$

and  $\zeta(x, q)$  is the Hurwitz zeta function.

*Proof.* Let  $P_t$  denote the consensus label at time  $t \in \mathbb{N}$ . We first show that the probability  $\delta_t$  of  $P_t \neq P_{t-1}$  is bounded. Since the learning algorithm  $\mathcal{A}$  at time  $t \geq t_0$  achieves a training accuracy  $a_t \geq 0.5$ , the probability can be determined via the CDF of the binomial distribution, i.e.,

$$\begin{aligned} \delta_t &= \mathbb{P}\left(\exists u \in U : \sum_{i=1}^m \mathbb{1}_{h_t^i(u)=v} < \left\lfloor \frac{m}{2} \right\rfloor\right) \\ &= F\left(\left\lfloor \frac{m}{2} \right\rfloor - 1, m, a_t\right) = \sum_{i=1}^{\left\lfloor \frac{m}{2} \right\rfloor - 1} \binom{m}{i} a_t^i (1 - a_t)^{m-i}. \end{aligned}$$

Applying the Chernoff bound and denoting by  $D(\cdot \parallel \cdot)$  the Kullback-Leibler divergence yields

$$\begin{aligned} \delta_t &\leq \exp\left(-mD\left(\frac{\left\lfloor \frac{m}{2} \right\rfloor - 1}{m} \parallel a_t\right)\right) \\ &= \exp\left(-m\left(\frac{\left\lfloor \frac{m}{2} \right\rfloor - 1}{m} \log \frac{\left\lfloor \frac{m}{2} \right\rfloor - 1}{a_t} + \left(1 - \frac{\left\lfloor \frac{m}{2} \right\rfloor - 1}{m}\right) \log \frac{1 - \frac{\left\lfloor \frac{m}{2} \right\rfloor - 1}{m}}{1 - a_t}\right)\right) \\ &\leq \exp\left(-m\left(\frac{\frac{m}{2}}{m} \log \frac{\frac{m}{2}}{a_t} + \left(1 - \frac{\frac{m}{2}}{m}\right) \log \frac{1 - \frac{\frac{m}{2}}{m}}{1 - a_t}\right)\right) \\ &= \exp\left(-m\left(\frac{1}{2} \log \frac{\frac{1}{2}}{a_t} + \frac{1}{2} \log \frac{\frac{1}{2}}{1 - a_t}\right)\right) = \exp\left(-\frac{m}{2} \log \frac{1}{2a_t} - \frac{m}{2} \log \frac{1}{2(1 - a_t)}\right) \\ &= \exp\left(\frac{m}{2} (\log 2a_t + \log 2(1 - a_t))\right) = (2a_t)^{\frac{m}{2}} (2(1 - a_t))^{\frac{m}{2}} = 4^{\frac{m}{2}} a_t^{\frac{m}{2}} (1 - a_t)^{\frac{m}{2}}. \end{aligned}$$

The union bound over all  $u \in U$  yields

$$\delta_t \leq |U| 4^{\frac{m}{2}} a_t^{\frac{m}{2}} (1 - a_t)^{\frac{m}{2}}.$$

To show convergence, we need to show that for  $t_0 \in \mathbb{N}$  it holds that

$$\sum_{t=t_0}^{\infty} \delta_t \leq \delta$$

for  $0 \leq \delta < 1$ . Since we assume that  $a_t$  grows linearly, we can write wlog.  $a_t = 1 - c/t$  for some  $c \in \mathbb{R}_+$  and  $t \geq 2c$ . With this, the sum can be written as

$$\begin{aligned} \sum_{t=t_0}^{\infty} \delta_t &\leq |U| \sum_{t=t_0}^{\infty} 4^{\frac{m}{2}} \left(1 - \frac{c}{t}\right)^{\frac{m}{2}} \left(\frac{c}{t}\right)^{\frac{m}{2}} = |U| 4^{\frac{m}{2}} \sum_{t=t_0}^{\infty} \left(\frac{\frac{t}{c} - 1}{\frac{t^2}{c^2}}\right)^{\frac{m}{2}} \\ &\leq |U| 4^{\frac{m}{2}} \sum_{t=t_0}^{\infty} \left(\frac{\frac{t}{c}}{\frac{t^2}{c^2}}\right)^{\frac{m}{2}} = (4c)^{\frac{m}{2}} \sum_{t=t_0}^{\infty} \left(\frac{1}{t}\right)^{\frac{m}{2}} = |U|(4c)^{\frac{m}{2}} \zeta\left(\frac{m}{2}\right) - H_{t_0}^{(\frac{m}{2})}, \end{aligned}$$

where  $\zeta(x)$  is the Riemann zeta function and  $H_n^{(x)}$  is the generalized harmonic number. Note that  $H_n^{(x)} = \zeta(x) - \zeta(x, n+1)$ , where  $\zeta(x, q)$  is the Hurwitz zeta function, so that this expression can be simplified to

$$\sum_{t=t_0}^{\infty} \delta_t \leq |U|(4c)^{\frac{m}{2}} \zeta\left(\frac{m}{2}\right) - \zeta\left(\frac{m}{2}\right) + \zeta\left(\frac{m}{2}, t_0 + 1\right) = |U|(4c)^{\frac{m}{2}} \zeta\left(\frac{m}{2}, t_0 + 1\right) .$$

□

## B PROOF OF PROPOSITION 2

For convenience, we restate the proposition.

**Proposition 2.** *For classification models  $h : \mathcal{X} \rightarrow \mathcal{Y}$ , let  $\ell$  be a loss function that upper bounds the 0 – 1-loss and  $\mathcal{A}$  a learning algorithm that is on-average-leave-one-out stable with stability rate  $\epsilon(m)$  for  $\ell$ . Let  $D \cup U$  be a local training set with  $|U| = n$ , and  $\delta \in (0, 1)$ . Then with probability  $1 - \delta$ , the sensitivity  $s_*$  of  $\mathcal{A}$  on  $U$  is bounded by*

$$s_* \leq \left\lceil n\epsilon(n) + P\sqrt{n\epsilon(n)(1 - \epsilon(n))} + \frac{P^2}{3} \right\rceil ,$$

where  $P = \Phi^{-1}(1 - \delta)$  with  $\Phi^{-1}$  being the probit function.

*Proof.* The sensitivity  $s_*$  is defined as the supremum of the Frobenius norm of the symmetric difference between the predictions on the unlabeled dataset  $U$  for two models  $h_s$  and  $h_{s'}$  trained on datasets  $s$  and  $s'$  that differ by one instance.

$$s_* = \sup_{S, S'} \|h_S(U) \Delta h_{S'}(U)\|_F$$

Since  $\mathcal{A}$  is on-average-replace-one stable with rate  $\epsilon$  for  $\ell$  and  $\ell$  upper bounds the 0 – 1-loss,  $\mathcal{A}$  is on-average-replace-one stable with rate at most  $\epsilon$  for the 0 – 1-loss. Thus, the expected change in loss on a single element of the training set is bounded by  $\epsilon(|D \cup U|)$ . Since the 0 – 1-loss is either 0 or 1, this can be interpreted as a success probability in a Bernoulli process. The expected number of differences on the unlabeled dataset then is the expected value of the corresponding binomial distribution, i.e.,  $|U|\epsilon(|D \cup U|) \leq |U|\epsilon(|U|)$ . We are interested in the maximum number of successes such that the cumulative distribution function of the binomial distribution is smaller than  $1 - \delta$ . This threshold  $k$  can be found using the quantile function (inverse CDF) for which, however, no closed form exists. [Short \(2023\)](#) has shown that the quantile function  $Q(n, p, R)$  can be bounded by

$$Q(n, p, R) \leq \left\lceil np + \Phi^{-1}(R)\sqrt{np(1 - p)} + \frac{\Phi^{-1}(R)^2}{3} \right\rceil ,$$

where  $\Phi^{-1}$  is the probit function (inverse of standard normal's cdf). With  $n = |u|$ ,  $p = \epsilon(|U|)$ , and  $R = 1 - \delta$ , the number of differences in predictions on the unlabeled dataset, i.e., the sensitivity  $s_*$ , is upper bounded by

$$s_* \leq \left\lceil |U|\epsilon(|U|) + \Phi^{-1}(1 - \delta)\sqrt{|U|\epsilon(|U|)(1 - \epsilon(|U|))} + \frac{\Phi^{-1}(1 - \delta)^2}{3} \right\rceil$$

with probability  $1 - \delta$ .

□

## C DETAILS ON EXPERIMENTS

### C.1 DETAILS ON PRIVACY VULNERABILITY EXPERIMENTS

We measure privacy vulnerability by performing membership inference attacks against FEDCT and FEDAVG. In both attacks, the attacker creates an attack model using a model it constructs from its training and test datasets. Similar to previous work [Shokri et al. \(2017\)](#), we assume that the training

data of the attacker has a similar distribution to the training data of the client. Once the attacker has its attack model, it uses this model for membership inference. In blackbox attacks (in which the attacker does not have access to intermediate model parameters), it only uses the classification scores it receives from the target model (i.e., client’s model) for membership inference. On the other hand, in whitebox attacks (in which the attacker can observe the intermediate model parameters), it can use additional information in its attack model. Since the proposed FEDCT does not reveal intermediate model parameters to any party, it is only subject to blackbox attacks. Vanilla federated learning on the other hand is subject to whitebox attacks. Each inference attack produces a membership score of a queried data point, indicating the likelihood of the data point being a member of the training set. We measure the success of membership inference as ROC AUC of these scores. The **vulnerability (VUL)** of a method is the ROC AUC of membership attacks over  $K$  runs over the entire training set (also called attack epochs) according to the attack model and scenario. A vulnerability of 1.0 means that membership can be inferred with certainty, whereas 0.5 means that deciding on membership is a random guess.

We assume the following attack model: clients are honest and the server may be semi-honest (follow the protocol execution correctly, but it may try to infer sensitive information about the clients). The main goal of a semi-honest server is to infer sensitive information about the local training data of the clients. This is a stronger attacker assumption compared to a semi-honest client since the server receives the most amount of information from the clients during the protocol, and a potential semi-honest client can only obtain indirect information about the other clients. We also assume that parties do not collude.

The attack scenario for FEDCT and DD is that the attacker can send a (forged) unlabeled dataset to the clients and observe their predictions, equivalent to one attack epoch ( $K = 1$ ); the one for FEDAVG and DP-FEDAVG is that the attacker receives model parameters and can run an arbitrary number of attacks—we use  $K = 500$  attack epochs.

## C.2 DATASETS

We use 3 standard image classification datasets: CIFAR10 (Krizhevsky et al., 2010), Fashion-MNIST (Xiao et al., 2017), and SVHN (Netzer et al., 2011). We describe the datasets and our preprocessing briefly.

*CIFAR10* consists of 50 000 training and 10 000 test  $32 \times 32$  color images in 10 classes with equal distribution (i.e., a total of 6 000 images per class). Images are normalized to zero mean and unit variance. *FashionMNIST* consists of 60 000 training and 10 000 test  $28 \times 28$  grayscale images of clothing items in 10 classes with equal distribution. Images are not normalized. *SVHN* (Street View House Numbers) consists of 630 420  $32 \times 32$  color images of digits from house numbers in Google Street View, i.e., 10 classes. The dataset is partitioned into 73 257 for training, 26 032 for testing, and 531 131 additional training images. In our experiments, we use only the training and testing set. Images are not normalized.

We use five standard datasets from the UCI Machine Learning repository for our experiments on collaboratively training interpretable models: WineQuality (Cortez et al., 2009), BreastCancer (Sudlow et al., 2015), AdultsIncome (Becker & Kohavi, 1996), Mushroom (Bache & Lichman, 1987), and Covtype (Blackard, 1998). A short description of the five datasets follows. *WineQuality* is a tabular dataset of 6 497 instances of wine with 11 features describing the wine (e.g., alcohol content, acidity, pH, and sulfur dioxide levels) and the label is a wine quality score from 0 to 10. We remove duplicate rows and transform the categorical type attribute to a numerical value. We then normalize all features to zero mean and unit variance. *BreastCancer* is a medical diagnostics tabular dataset with

| Dataset      | training size   | testing size    | unlabeled size $ U $ | communication period $b$ | number of rounds $T$ |
|--------------|-----------------|-----------------|----------------------|--------------------------|----------------------|
| CIFAR10      | $40 \cdot 10^3$ | $10 \cdot 10^3$ | $10 \cdot 10^3$      | 10                       | $3 \cdot 10^3$       |
| FashionMNIST | $10 \cdot 10^3$ | $10 \cdot 10^3$ | $50 \cdot 10^3$      | 50                       | $20 \cdot 10^3$      |
| Pneumonia    | 4386            | 624             | 900                  | 20                       | $20 \cdot 10^3$      |
| MRI          | 30              | 53              | 170                  | 6                        | $2 \cdot 10^3$       |
| SVHN         | 38 257          | 26 032          | $35 \cdot 10^3$      | 10                       | $20 \cdot 10^3$      |

Table 3: Dataset descriptions for image classification experiments.

| Layer              | Output Shape | Activation | Parameters |
|--------------------|--------------|------------|------------|
| Conv2D             | (32, 32, 32) | ReLU       | 896        |
| BatchNormalization | (32, 32, 32) | -          | 128        |
| Conv2D             | (32, 32, 32) | ReLU       | 9248       |
| BatchNormalization | (32, 32, 32) | -          | 128        |
| MaxPooling2D       | (16, 16, 32) | -          | -          |
| Dropout            | (16, 16, 32) | -          | -          |
| Conv2D             | (16, 16, 64) | ReLU       | 18496      |
| BatchNormalization | (16, 16, 64) | -          | 256        |
| Conv2D             | (16, 16, 64) | ReLU       | 36928      |
| BatchNormalization | (16, 16, 64) | -          | 256        |
| MaxPooling2D       | (8, 8, 64)   | -          | -          |
| Dropout            | (8, 8, 64)   | -          | -          |
| Conv2D             | (8, 8, 128)  | ReLU       | 73856      |
| BatchNormalization | (8, 8, 128)  | -          | 512        |
| Conv2D             | (8, 8, 128)  | ReLU       | 147584     |
| BatchNormalization | (8, 8, 128)  | -          | 512        |
| MaxPooling2D       | (4, 4, 128)  | -          | -          |
| Dropout            | (4, 4, 128)  | -          | -          |
| Flatten            | (2048,)      | -          | -          |
| Dense              | (128,)       | ReLU       | 262272     |
| BatchNormalization | (128,)       | -          | 512        |
| Dropout            | (128,)       | -          | -          |
| Dense              | (10,)        | Linear     | 1290       |

Table 4: CIFAR10 architecture

569 instances of breast cell samples with 30 features describing cell nuclei with 2 classes (malignant and benign). We followed the same preprocessing steps as WineQuality dataset. *AdultIncome* is a tabular dataset with 48,842 instances of adults from various backgrounds with 14 features describing attributes such as age, work class, education, marital status, occupation, relationship, race, gender, etc. The dataset is used to predict whether an individual earns more than 50,000\$ a year, leading to two classes: income more than 50,000\$, and income less than or equal to 50,000\$. *Mushroom* is a biological tabular dataset with 8124 instances of mushroom samples with 22 features describing physical characteristics such as cap shape, cap surface, cap color, bruises, odor, gill attachment, etc. The dataset is used to classify mushrooms as edible or poisonous, leading to two classes: edible and poisonous. *Coverttype* is an environmental tabular dataset with 581,012 instances of forested areas with 54 features describing geographical and cartographical variables, such as elevation, aspect, slope, horizontal distance to hydrology, vertical distance to hydrology, horizontal distance to roadways, hillshade indices, and wilderness areas and soil type binary indicators. The dataset is used to predict forest cover type, leading to 7 distinct classes: Spruce/Fir, Lodgepole Pine, Ponderosa Pine, Cottonwood/Willow, Aspen, Douglas-fir, and Krummholz.

Furthermore, we use 2 medical image classification datasets, Pneumonia (Kermany et al., 2018), and MRI<sup>3</sup>. *Pneumonia* consists of 5286 training and 624 test chest x-rays with labels *normal*, *viral pneumonia*, and *bacterial pneumonia*. We simplify the labels to *healthy* and *pneumonia* with a class imbalance of roughly 3 pneumonia to 1 healthy. The original images in the Pneumonia dataset do not have a fixed resolution as they are sourced from various clinical settings and different acquisition devices. We resize all images to a resolution of  $224 \times 224$  pixels without normalization. *MRI* consists of 253 MRI brain scans with a class imbalance of approximately 1.5 brain tumor scans to 1 healthy scan. Out of the total 253 images, we use 53 images as testing set. Similar to the pneumonia dataset, the original images have no fixed resolution and are thus resized to  $150 \times 150$  without normalization.

### C.3 EXPERIMENTAL SETUP

We now describe the details of the experimental setup used in our empirical evaluation.

<sup>3</sup><https://www.kaggle.com/datasets/navoneel/brain-mri-images-for-brain-tumor-detection>

| Layer   | Output Shape | Activation | Parameters |
|---------|--------------|------------|------------|
| Flatten | (784,)       | -          | -          |
| Linear  | (784, 512)   | -          | 401,920    |
| ReLU    | (512,)       | ReLU       | -          |
| Linear  | (512, 512)   | -          | 262,656    |
| ReLU    | (512,)       | ReLU       | -          |
| Linear  | (512, 10)    | -          | 5,130      |

Table 5: FashionMNIST architecture

In our privacy-utility trade-off experiments, we use  $m = 5$  clients for all datasets. We report the split into training, test, and unlabeled dataset per dataset, as well as the used communication period  $b$  and number of rounds  $T$  in Table 3. For the scalability experiments, we use the same setup, varying  $m \in \{5, 10, 20, 40, 80\}$  clients. For the experiments on heterogeneous data distributions, we use the same setup as for the privacy-utility trade-off, but we sample the local dataset from a Dirichlet distribution as described in the main text.

For all experiments, we use Adam as an optimization algorithm with a learning rate 0.01 for CIFAR10, and 0.001 for the remaining datasets. A description of the DNN architecture for each dataset follows.

The neural network architectures used for each dataset are given in the following. For CIFAR10 we use a CNN with multiple convolutional layers with batch normalization and max pooling. The details of the architecture are described in Table 4. For FashionMNIST, we use a simple feed forward architecture on the flattened input. The details of the architecture are described in Table 5. For Pneumonia, we use a simple CNN, again with batch normalization and max pooling, with details given in Table 6. For MRI we use an architecture similar to pneumonia with details described in Table 7. For SVHN, we use again a standard CNN with batch normalization and max pooling, detailed in Table 8.

For our experiments on interpretable models, we use  $m = 5$  clients. For decision trees (DT), we split by the Gini index with at least 2 samples for splitting. For RuleFit, we use a tree size of 4 and a maximum number of rules of 200. For the WineQuality dataset, we use an unlabeled dataset size of  $U = 4100$ , a training set size of 136, and a test set size of 1059. For BreastCancer, we use an unlabeled dataset of size  $U = 370$ , a training set of size 85, and a test set of size 114. For the AdultsIncome dataset, we use an unlabeled dataset of size  $U = 10^4$ , a training set of size 31,073, and a test set of size 7769. For the Mushroom dataset, we use an unlabeled dataset of size  $U = 4000$ , a training set of size 2499, and a test set of size 1625. For the coverytype dataset, we use an unlabeled dataset of size  $U = 5 \cdot 10^4$ , a training set of size 414,810, and a test set of size 116,202.

| Layer       | Output Shape | Activation | Parameters |
|-------------|--------------|------------|------------|
| Conv2d      | (3, 32, 32)  | -          | 896        |
| BatchNorm2d | (32, 32, 32) | -          | 64         |
| Conv2d      | (32, 32, 32) | -          | 18,464     |
| BatchNorm2d | (64, 32, 32) | -          | 128        |
| MaxPool2d   | (64, 16, 16) | -          | -          |
| Conv2d      | (64, 16, 16) | -          | 36,928     |
| BatchNorm2d | (64, 16, 16) | -          | 128        |
| MaxPool2d   | (64, 8, 8)   | -          | -          |
| Flatten     | (4096,)      | -          | -          |
| Linear      | (2,)         | -          | 4,194,306  |

Table 6: Pneumonia architecture

---

| Layer       | Output Shape | Activation | Parameters |
|-------------|--------------|------------|------------|
| Conv2d      | (3, 32, 32)  | -          | 896        |
| BatchNorm2d | (32, 32, 32) | -          | 64         |
| Conv2d      | (32, 32, 32) | -          | 18,464     |
| BatchNorm2d | (64, 32, 32) | -          | 128        |
| MaxPool2d   | (64, 16, 16) | -          | -          |
| Conv2d      | (64, 16, 16) | -          | 36,928     |
| BatchNorm2d | (64, 16, 16) | -          | 128        |
| MaxPool2d   | (64, 8, 8)   | -          | -          |
| Flatten     | (32768,)     | -          | -          |
| Linear      | (2,)         | -          | 2,636,034  |

Table 7: MRI architecture

| Layer       | Output Shape | Parameters |
|-------------|--------------|------------|
| Conv2d      | (3, 32, 32)  | 896        |
| BatchNorm2d | (32, 32, 32) | 64         |
| Conv2d      | (32, 32, 32) | 9,248      |
| MaxPool2d   | (32, 16, 16) | -          |
| Dropout2d   | (32, 16, 16) | -          |
| Conv2d      | (32, 16, 16) | 18,464     |
| BatchNorm2d | (64, 16, 16) | 128        |
| Conv2d      | (64, 16, 16) | 36,928     |
| MaxPool2d   | (64, 8, 8)   | -          |
| Dropout2d   | (64, 8, 8)   | -          |
| Conv2d      | (64, 8, 8)   | 73,856     |
| BatchNorm2d | (128, 8, 8)  | 256        |
| Conv2d      | (128, 8, 8)  | 147,584    |
| MaxPool2d   | (128, 4, 4)  | -          |
| Dropout2d   | (128, 4, 4)  | -          |
| Flatten     | (2048,)      | -          |
| Linear      | (128,)       | 262,272    |
| Dropout     | (128,)       | -          |
| Linear      | (10,)        | 1,290      |

Table 8: SVHN architecture
